# Supplementary material for: Non-equilibrium Plasma Activated Ultradurable Molybdenum Oxycarbide Electrocatalysts for Acidic Hydrogen Evolution up to 10 A cm-2
Source: Research Square preprint supplement (doi:10.21203/rs.3.rs-5954144/v1), 2025-03-13
Supplement: Supplementary file 1 [file 72938561a1ff7fc9e3e85c87.docx]

**Supplementary Materials** for

**Non-equilibrium Plasma Activated Ultradurable Molybdenum Oxycarbide Electrocatalysts for Acidic Hydrogen Evolution up to 10 A cm-2**

Shiwen Wu1, **†**, Taesoon Hwang2, **†**, Amirarsalan Mashhadian1, **†**, Tianyi Li3, Yuzi Liu4, Dewen Hou4,*, Kyeongjae Cho2,*, Guoping Xiong1,*

1. Department of Mechanical Engineering, The University of Texas at Dallas, Richardson, Texas 75080, USA

2. Department of Material Science Engineering, The University of Texas at Dallas, Richardson, Texas 75080, USA

3. X-ray Science Division, Argonne National Laboratory, 9700 South Cass Avenue, Lemont, IL, 60439, USA

4. Center for Nanoscale Materials, Argonne National Laboratory, 9700 South Cass Avenue, Lemont, IL, 60439, USA

**†** Shiwen Wu, Taesoon Hwang, and Amirarsalan Mashhadian contribute equally

* Corresponding authors: Dewen Hou: [houd@anl.gov](mailto:houd@anl.gov); Kyeongjae Cho: [kjcho@utdallas.edu](mailto:kjcho@utdallas.edu); Guoping Xiong: [guoping.xiong@utdallas.edu](mailto:guoping.xiong@utdallas.edu)

**Section S1 Supplementary Figures**


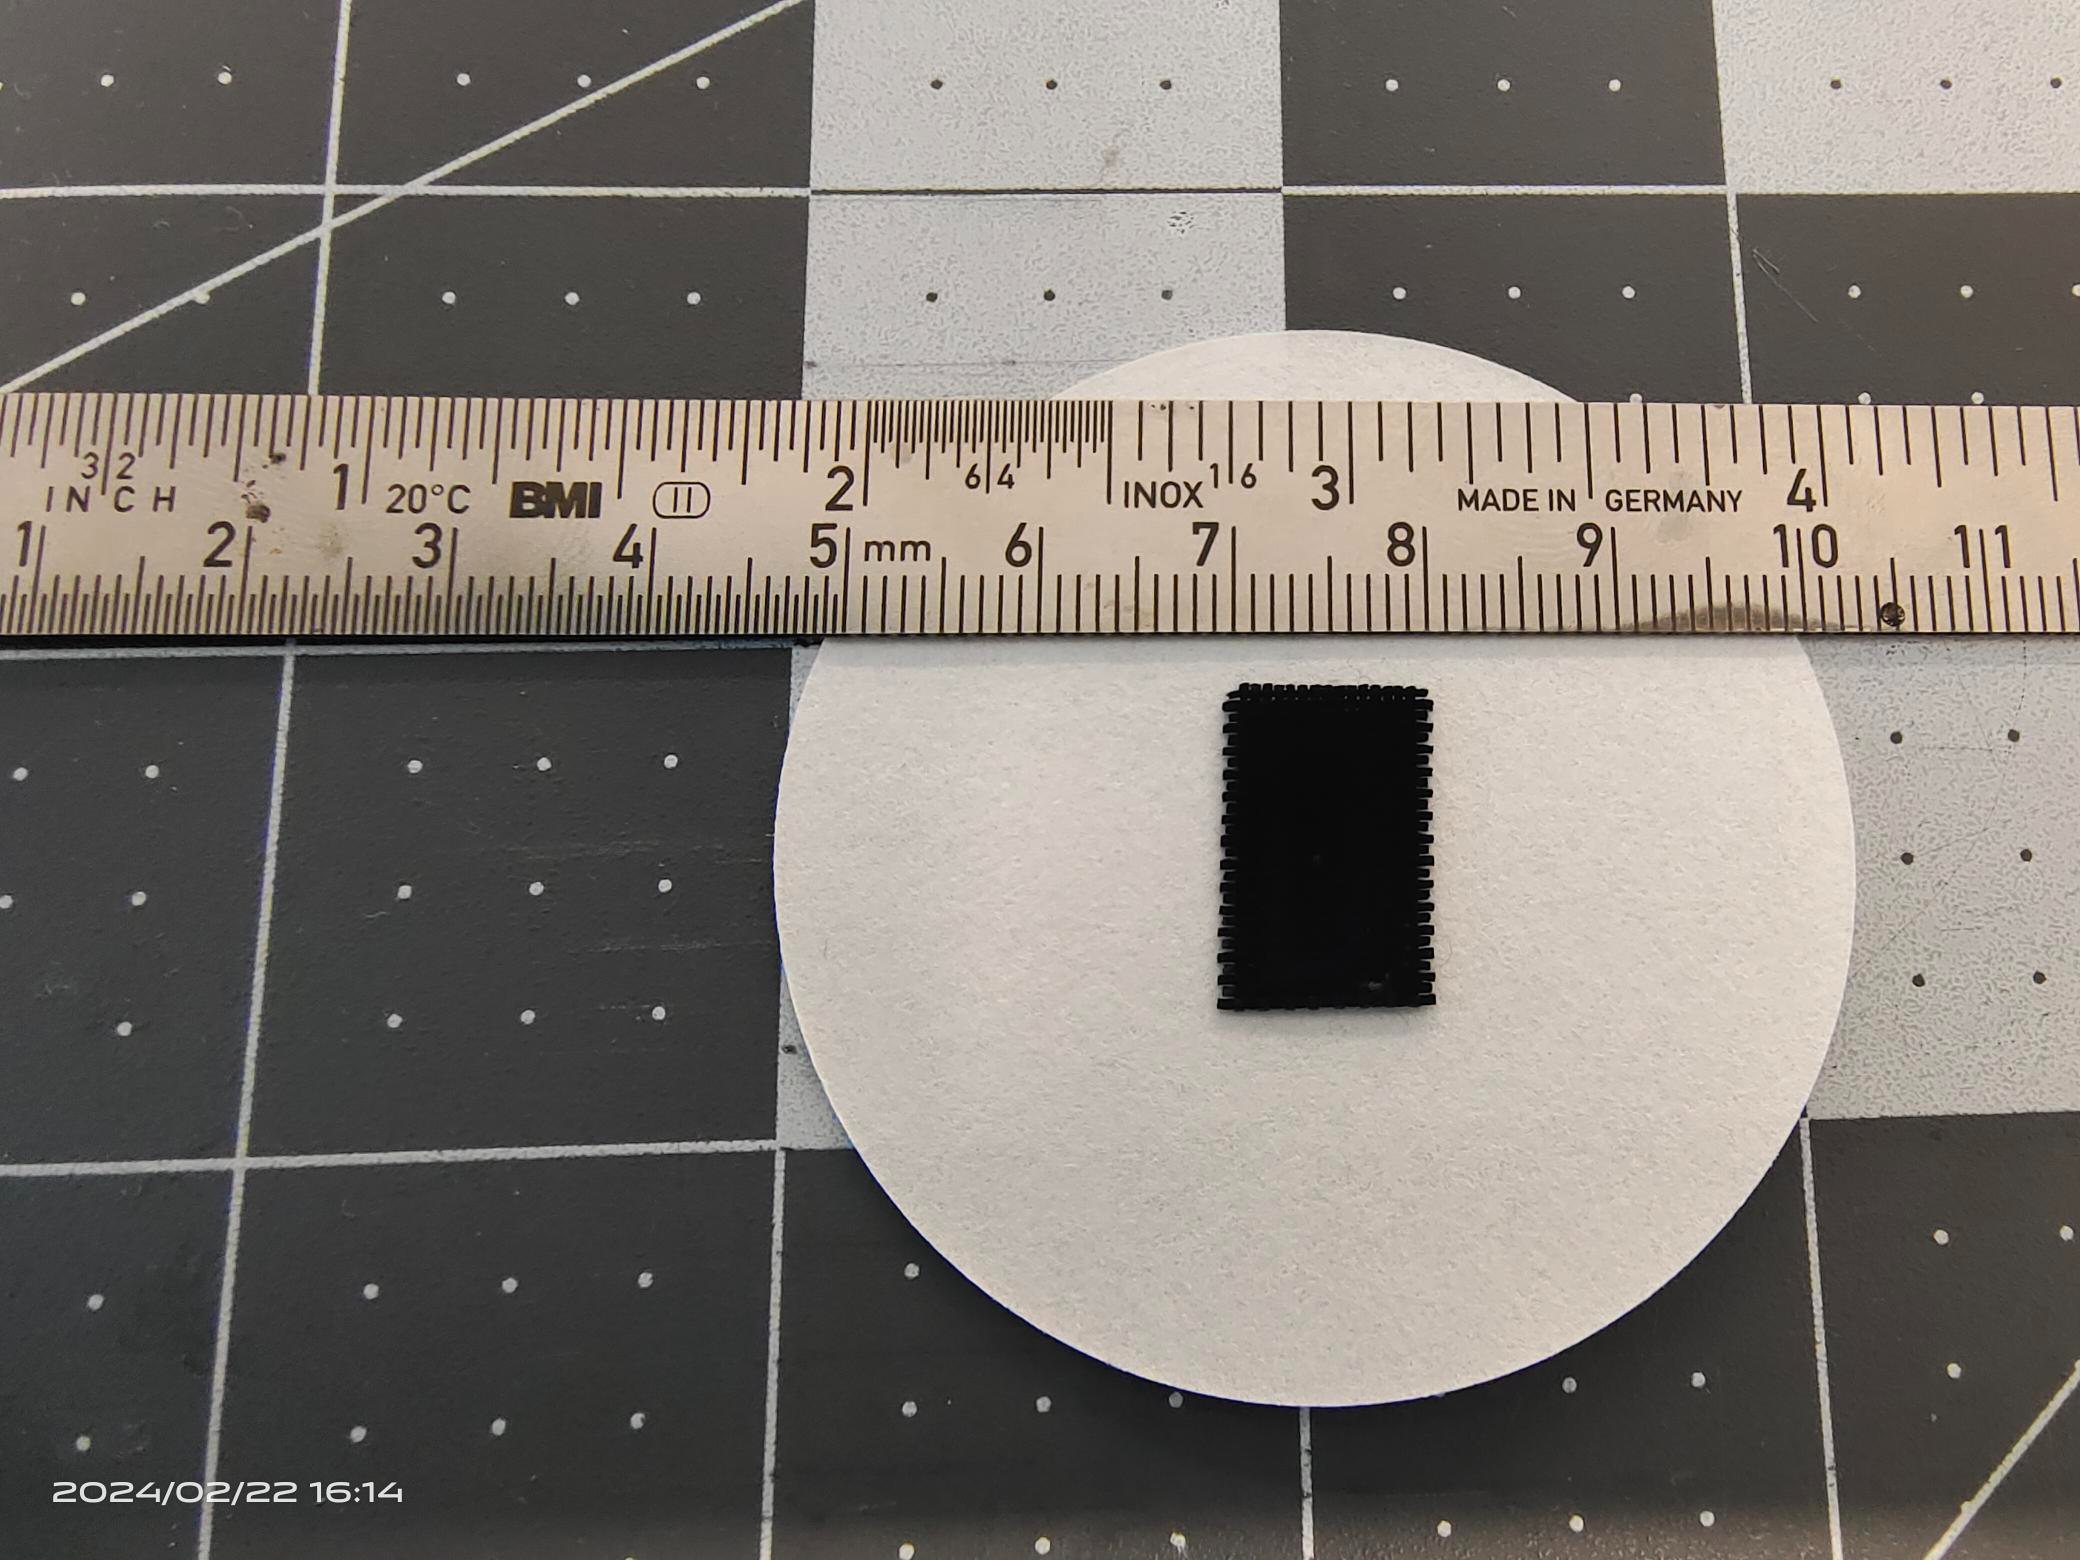


Figure S1. Optical image of HCP-MoOC.





Figure S2. SEM image of HP-MoO2 grown on Ni foam.


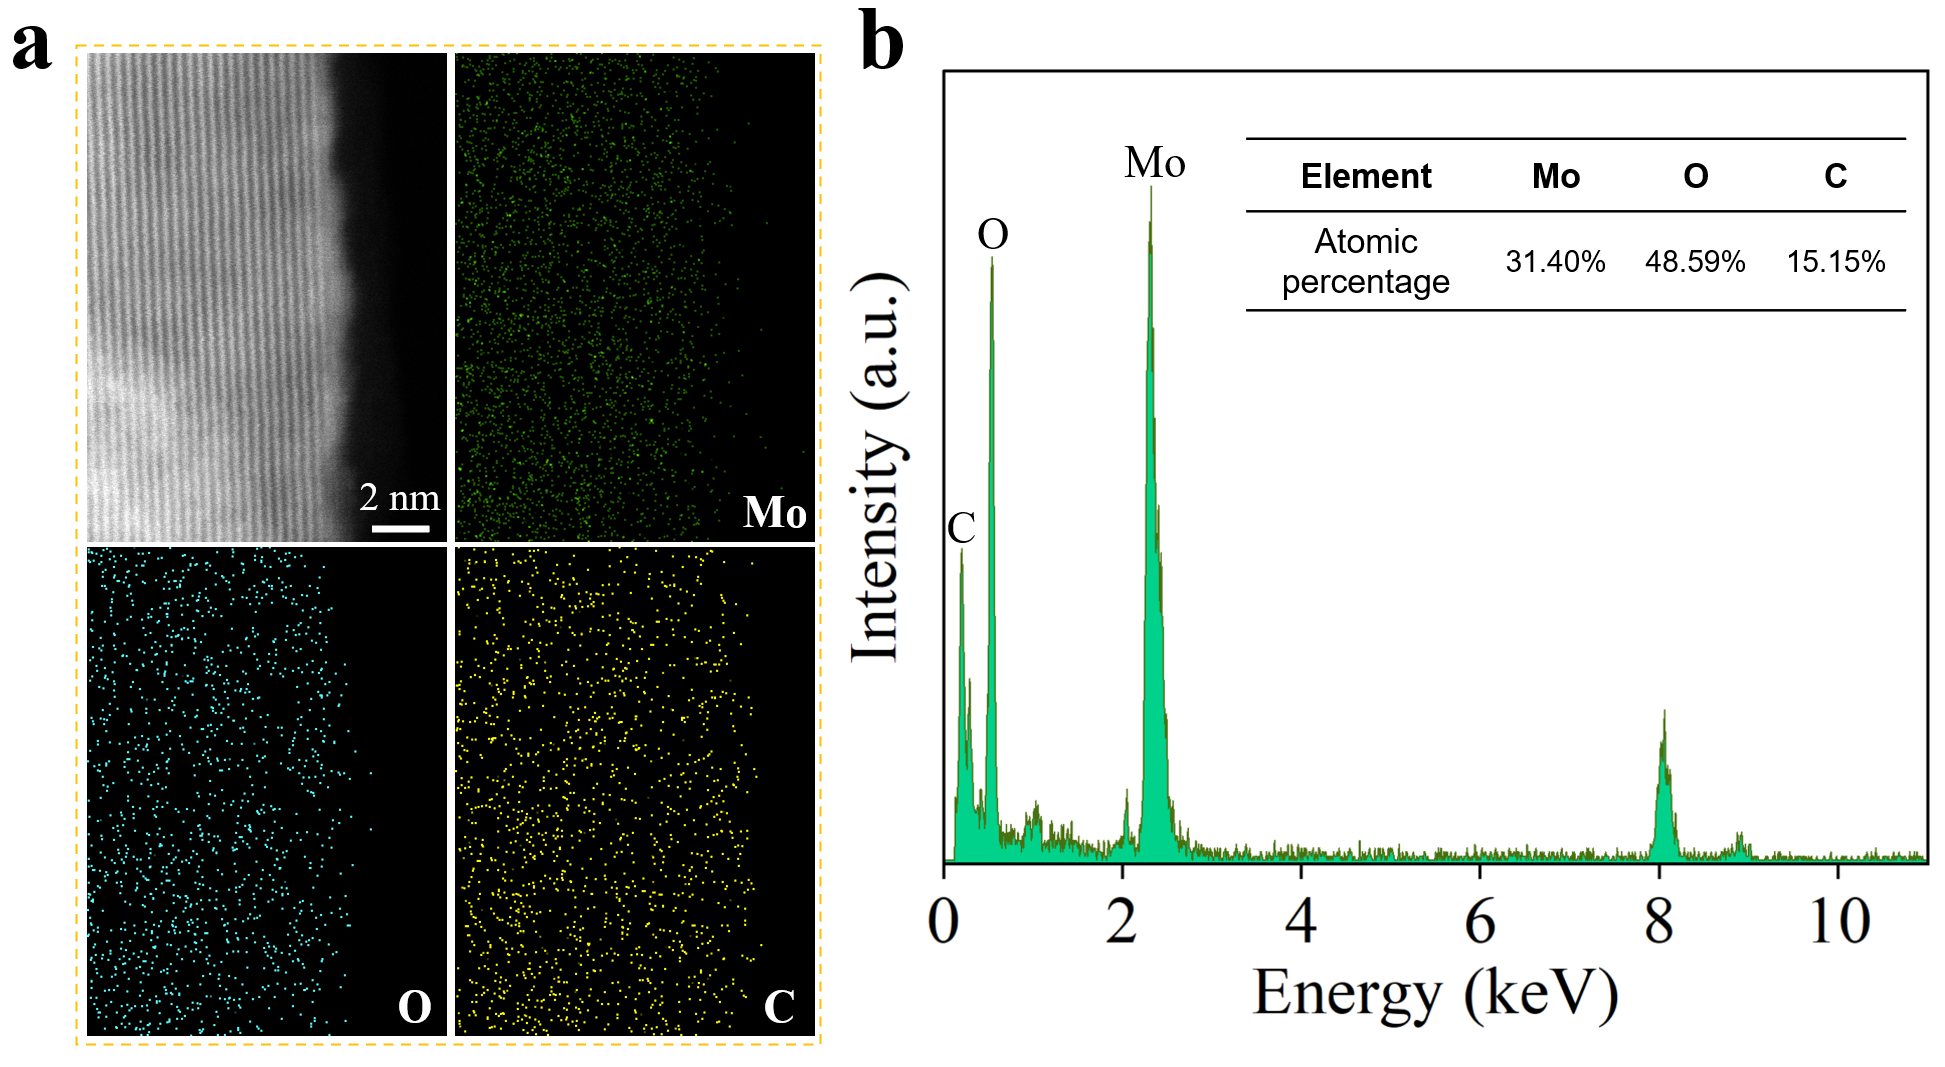


Figure S3. (a) Element mappings of a single MoO*x*C*y* sheet in the HP-MoOC. (b) Quantitative EDX analysis showing a Mo:O:C weight ratio of approximately 1:1.5:0.5 in the HP-MoOC nanosheet.


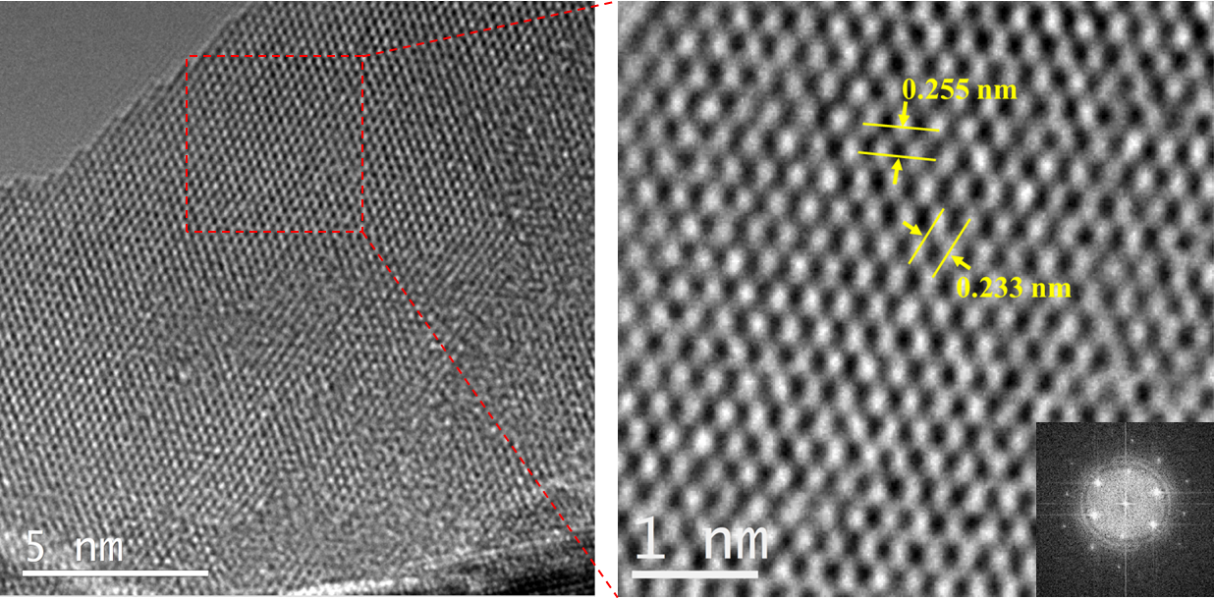


Figure S4. HRTEM images of HP-MoOC with the corresponding FFT pattern in the inset.


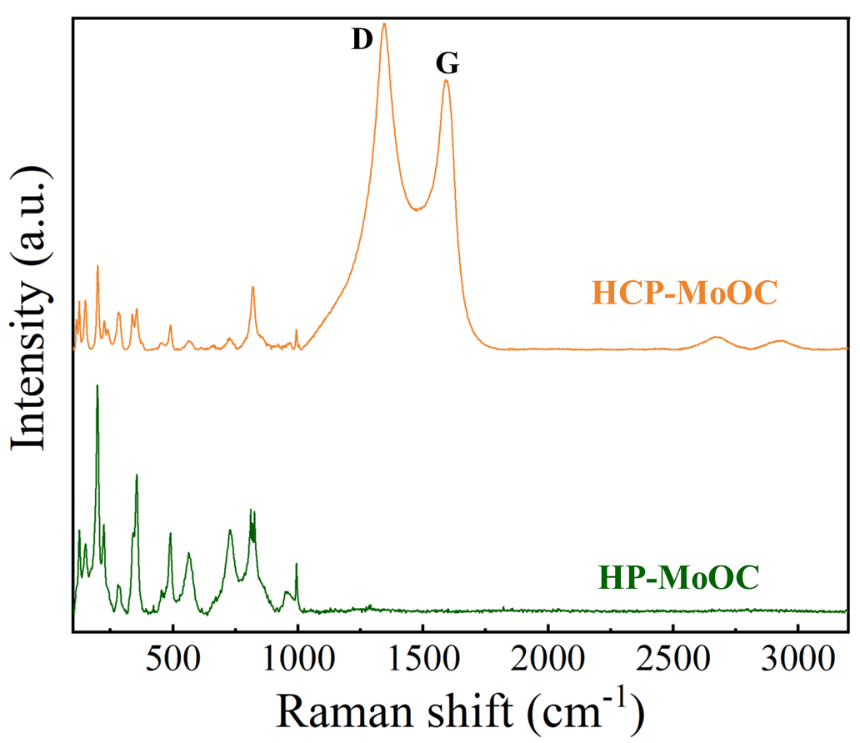


Figure S5. Raman spectra of HCP-MoOC and HP-MoOC.


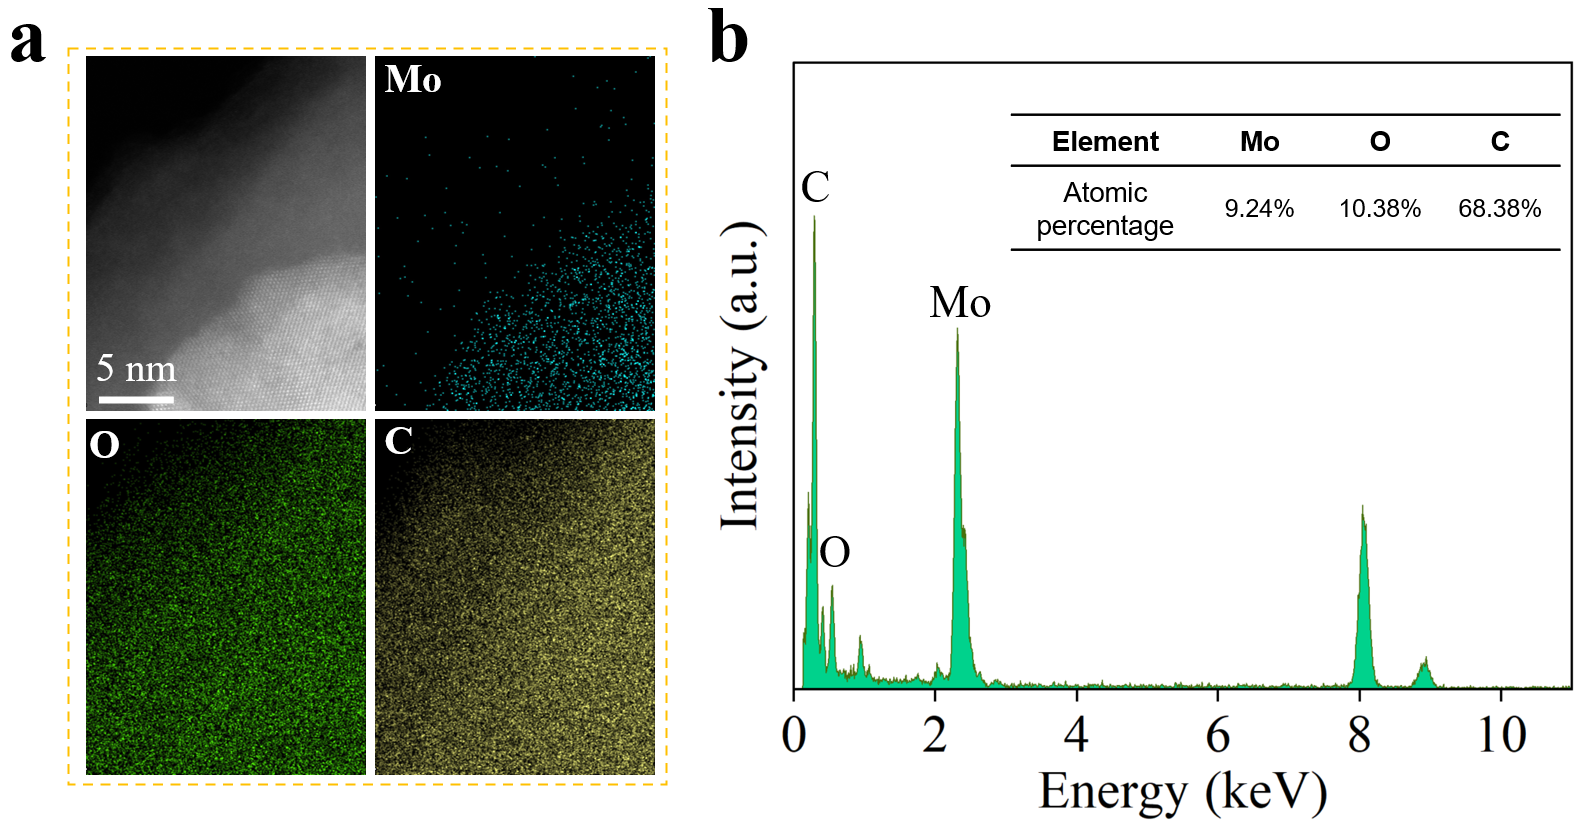


Figure S6. (a) Element mappings of a single MoO*x*C*y* sheet in the HCP-MoOC. (b) Quantitative EDX analysis showing a Mo:O:C weight ratio of approximately 1:1:7 in the HP-MoOC nanosheet. Note that the results cannot represent the real atomic ratio inside the crystalline structure of HCP-MoOC because of the existence of the carbon layer coating.


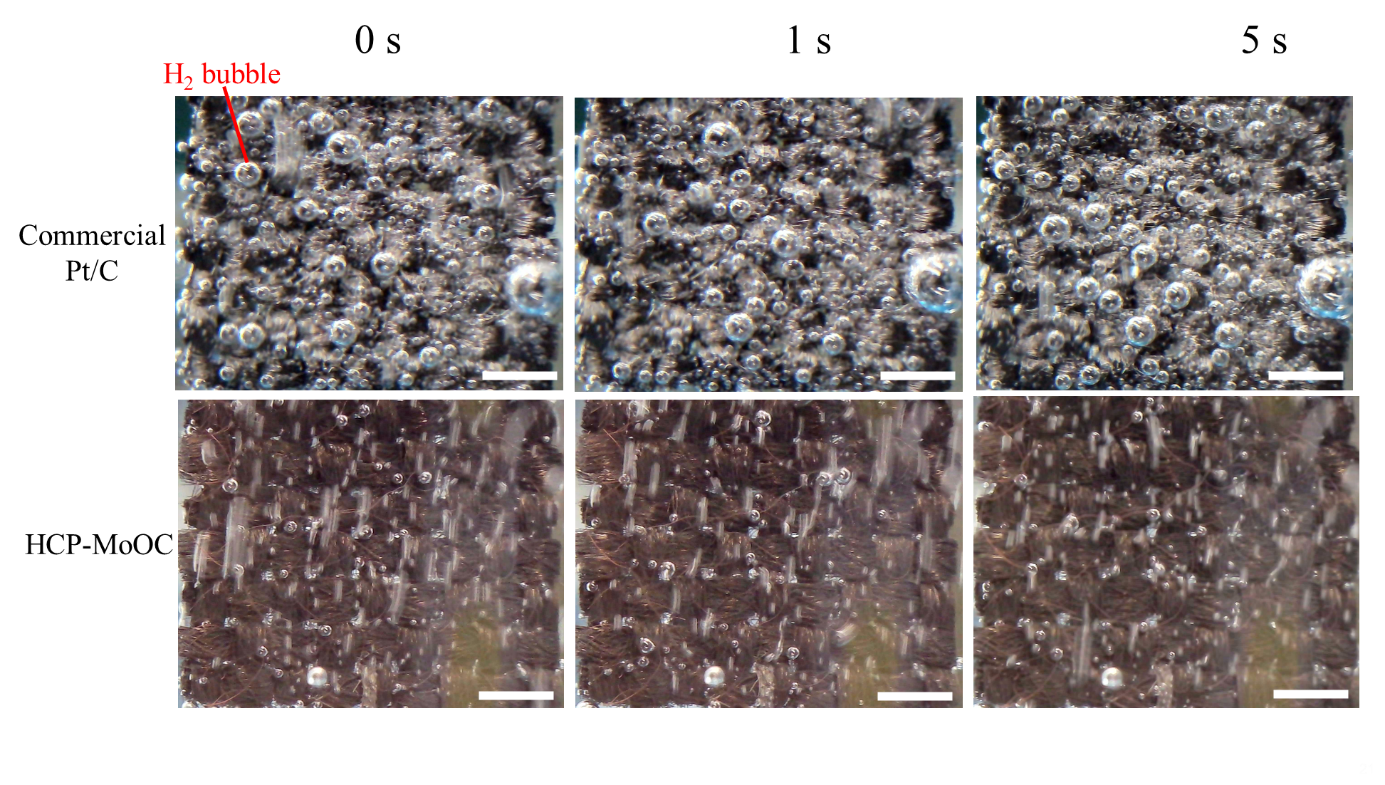


Figure S7. Bubble evolution of Pt/C and HCP-MoOC catalysts at a current density of 100 mA cm-2. Scale bar: 1 mm.

**Section S2 Supplementary Notes**

**Note S1**

To quantitatively determine the atomic ratio within the crystalline structure of HCP-MoOC, hydrogen plasma treatment was performed at room temperature to etch the surface carbon layer. Specifically, the HCP-MoOC samples were cut into 0.5 cm × 1 cm pieces and placed in a crucible boat inside a quartz tube. Next, the tube was evacuated to a pressure of <3 Pa, followed by the introduction of a hydrogen gas flow at 10 mL min–1. The pressure was controlled at 30 Pa, and a 300 W radio frequency source was coupled into the quartz tube to initiate the plasma treatment process.

HCP-MoOC treated by H2 plasma for 2, 5, 10, and 20 minutes were labeled as HCP-MoOC-HE2, HCP-MoOC-HE5, HCP-MoOC-HE10, and HCP-MoOC-HE20, respectively. Raman spectroscopy was used to characterize all samples. As shown in Figure S8a, the intensities of the peaks corresponding to the surface carbon layer (i.e., D- and G-band peaks) gradually decreased with increasing treatment time, while the peaks representing MoO*x*C*y* (100-1000 cm-1) unchanged up to 10 minutes of treatment. This suggests that the surface carbon layer was gradually etched away by the 10-minute plasma treatment, but further exposure (20 minutes) began to damage the MoO*x*C*y* crystalline structure. Thus, HCP-MoOC-HE10 can be considered representative of HCP-MoOC without the surface carbon layer. We note that weak D- and G-band peaks can still be observed in the Raman spectrum of HCP-MoOC-HE10, which may arise from the residue carbon located in the valleys of the vertically standing MoO*x*C*y* nanosheets. As shown in Figure S8b, while HER activity slightly improved after the removal of the surface carbon layer, the catalyst’s stability significantly deteriorated.


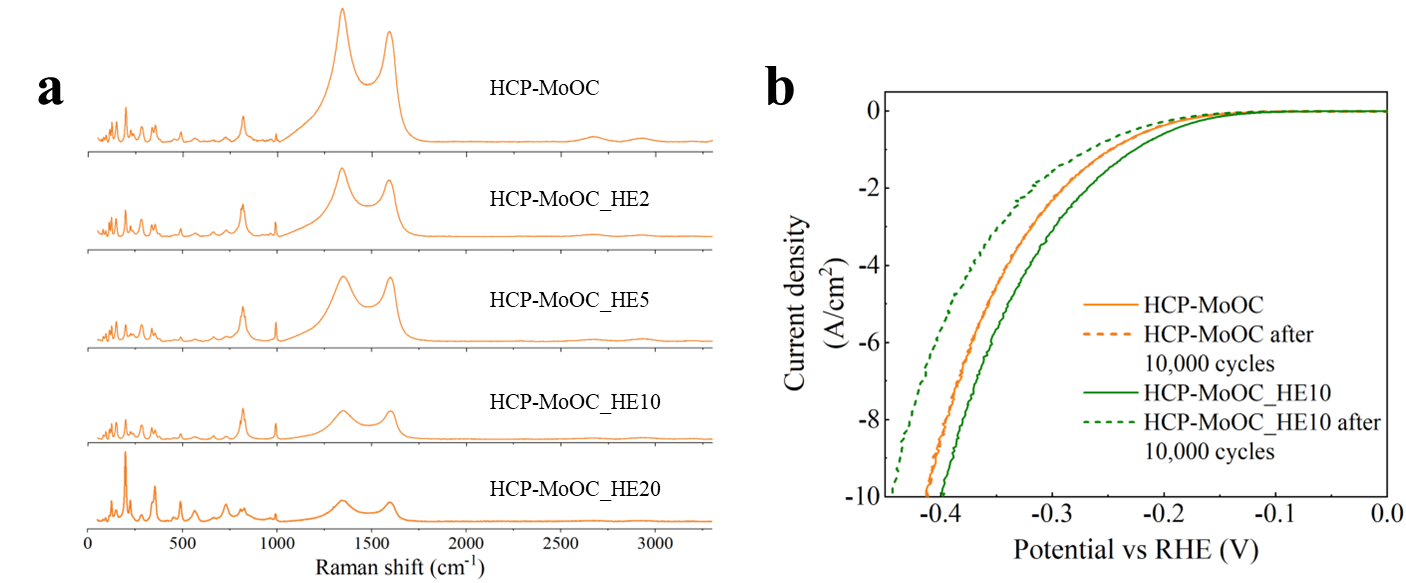


Figure S8. (a) Raman spectra of HCP-MoOC with different H2 plasma treatment durations. (b) Polarization curves of HCP-MoOC and HCP-MoOC_HE10 before and after 10,000 cycles.


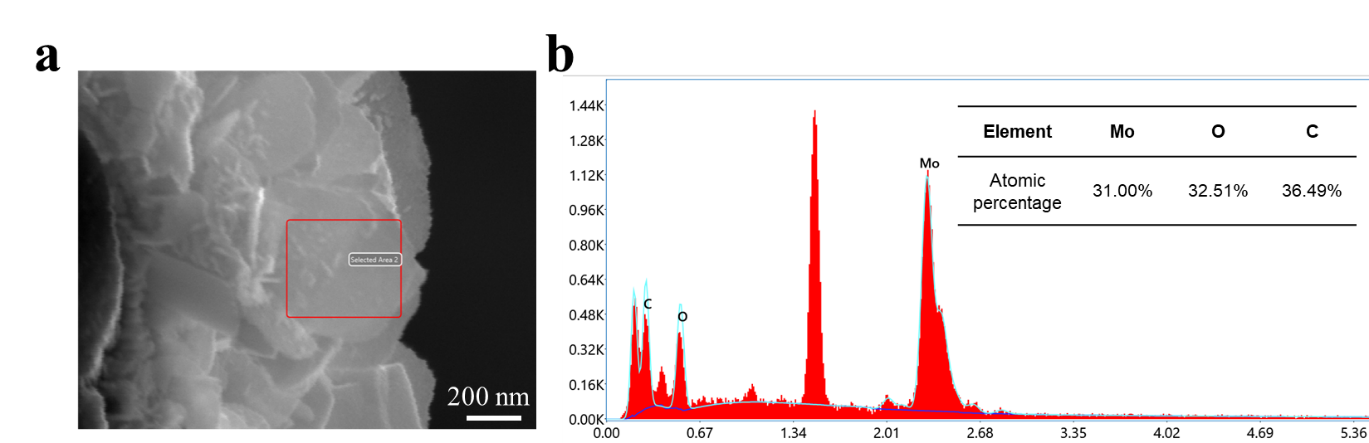


Figure S9. (a) Cross-sectional SEM image and (b) EDX analysis of atomic percentage of the HCP-MoOC-HE10.


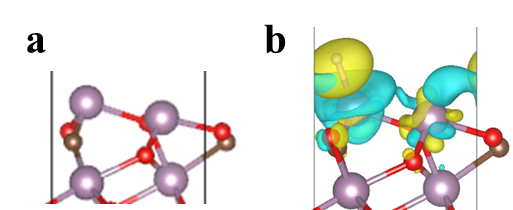


Figure S10. (a) Atomic models and (b) charge distributions of HP-MoOC.


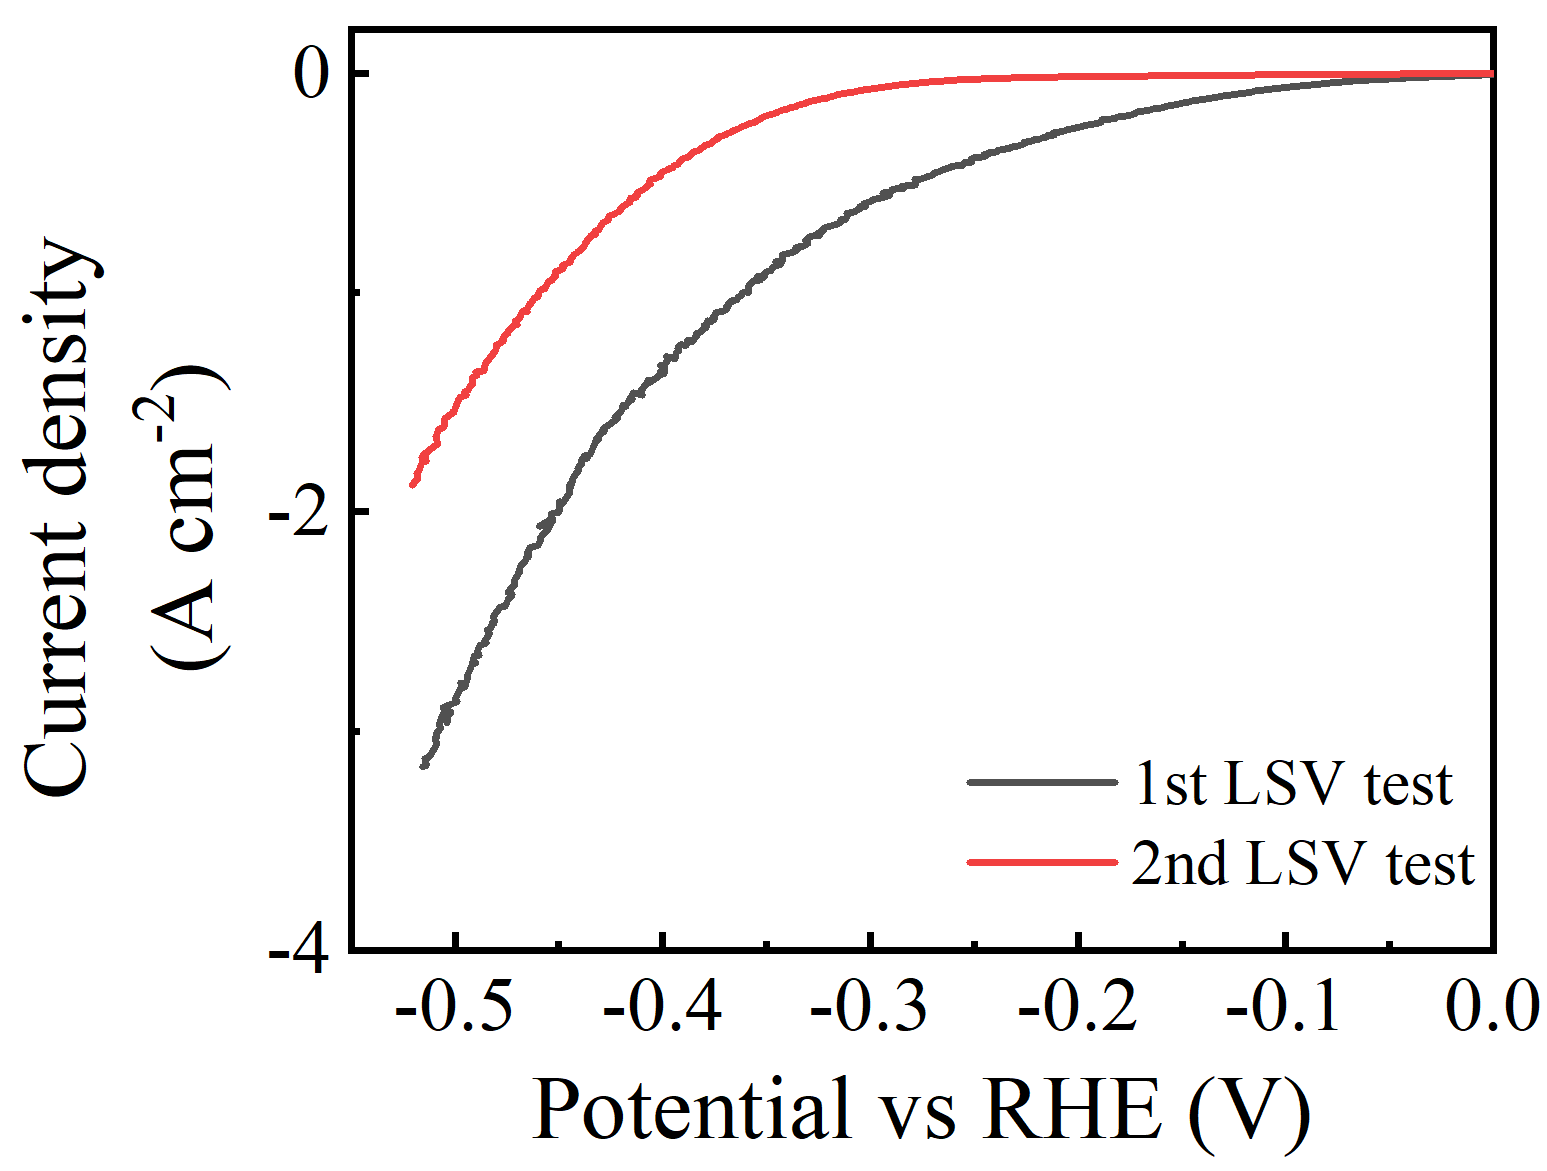


Figure S11. Polarized curves of commercial Pt/C catalysts during repeated LSV tests.


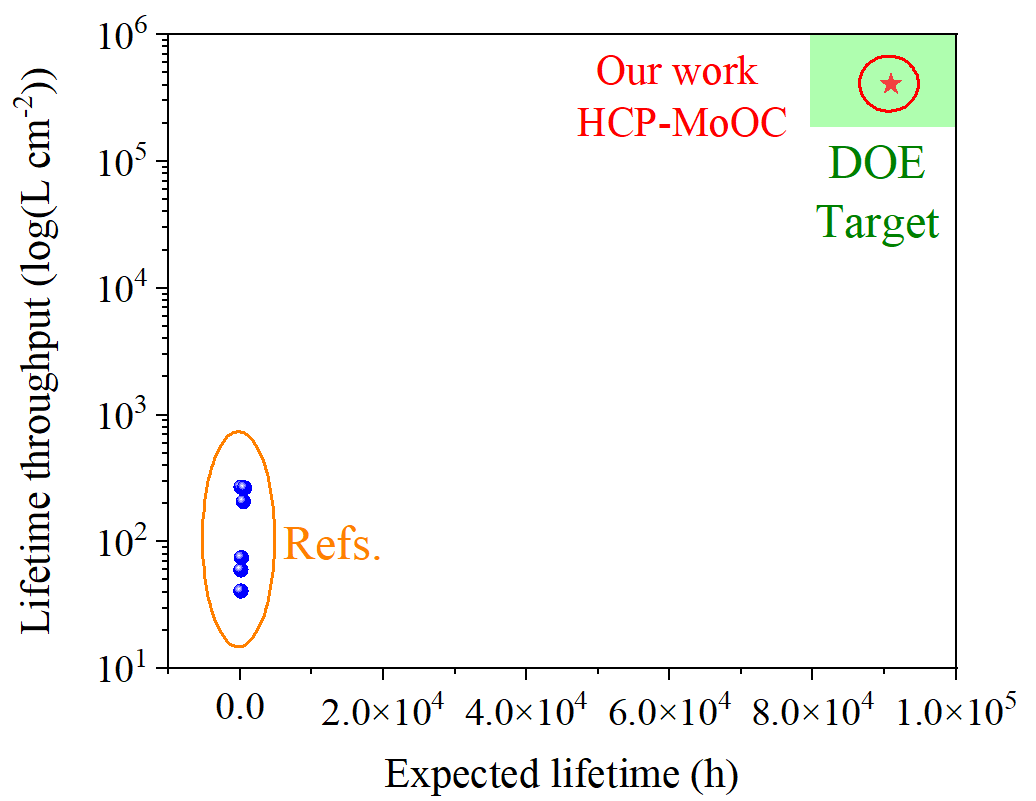


Figure S12. Comparison of hydrogen lifetime throughput and expected lifetime (calculated based on the 10% threshold by U.S. department of energy (DOE)) of HCP-MoOC and state-of-the-art catalysts

**Section S3 Supplementary Tables**

Table S1. Comparison between the overpotential of acidic HER at large current densities for the HCP-MoOC and the state-of-the-art catalysts

| **Reference** | **Paper** | **Catalyst** | **Overpotential** | **Current density** | **Electrolyte** |
| --- | --- | --- | --- | --- | --- |
| [1] | Nat. Mater. | 2H-Nb1.35S2 | 420 mV | 5,000 mA cm-2 | 0.5 M H2SO4 |
| [2] | Adv. Mater. | single-layer Mo2C | 460 mV | 5,000 mA cm-2 | 0.5 M H2SO4 |
| [3] | Nat. Commun. | Ta-TaS2 | 398 mV | 2,000 mA cm-2 | 0.5 M H2SO4 |
| [4] | J. Am. Chem. Soc. | α-MoB2 | 413 mV | 2,000 mA cm-2 | 0.5 M H2SO4 |
| 334 mV | 1,000 mA cm-2 |
| [5] | Nat. Commun. | Co/Se-MoS2–NF | 382 mV | 1,000 mA cm-2 | 0.5 M H2SO4 |
| [6] | Nat. Commun. | MoC2/MoS2 | 227 mV | 1,000 mA cm-2 | 0.5 M H2SO4 |
| [7] | Nat. Commun. | HC-MoS2/Mo2C | 414 mV | 1,000 mA cm-2 | 0.5 M H2SO4 |
| [8] | Adv. Mater. | Co–N–C | 343 mV | 1,000 mA cm-2 | 0.5 M H2SO4 |
| - | **Our work** | **HCP-MoOC** | **358 mV** | **5,000 mA cm-2** | **0.5 M H2SO4** |
| **415 mV** | **10,000 mA cm-2** | **0.5 M H2SO4** |

Table S2. Summary of the electrocatalytic hydrogen evolution performance of the HCP-MoOC and state-of-the-art catalysts

| **Ref.** | **Journal** | **Catalyst** | **Current density**  **(mA cm-2)** | **Stability (h)** | **H2 throughput**  **(L cm-2)** | **Performance degradation (%)** | **Expected lifetime (h)** | **Lifetime throughput (L cm-2)** |
| --- | --- | --- | --- | --- | --- | --- | --- | --- |
| [6] | Nat. Commun. | Mo2S/Mo2C | 200 | 24 | 2.15 | ̶ | ̶ | ̶ |
| [3] | Nat. Commun. | Ta-TaS2 | 500 | 175 | 39.18 | ̶ | ̶ | ̶ |
| 1,000 | 25 | 11.19 | ̶ | ̶ | ̶ |
| [2] | Adv. Mater. | Edge-enriched Mo2C | 2,000 | 8 | 7.16 | ̶ | ̶ | ̶ |
| [1] | Nat. Mater. | NbS2 | 5,000 | 120 | 268.64 | ~ 10* | ~ 120* | 268.6* |
| [4] | J. Am. Chem. Soc. | MoB2 | 1,500 | 60 | 40.3 | ~ 6.74* | ~ 89* | 59.8* |
| [5] | Nat. Commun. | Co/Se doped MoS2 | 1,000 | 360 | 161.19 | ~ 6.07* | ~ 593* | 265.5* |
| [7] | Nat. Commun. | HC-MoS2/Mo2C | 450 | 24 | 4.84 | ̶ | ̶ | ̶ |
| 200 | 24 | 2.15 | ̶ | ̶ | ̶ |
| [8] | Adv. Mater. | Co–N–C | 1,000 | 32 | 14.33 | ~ 3.52* | ~ 91* | 40.7* |
| [9] | Adv. Funct. Mater. | Co-Co2P@NPC/rGO | 1,000 | 20 | 8.95 | 1.2 | ~ 167* | 74.6* |
| [10] | Chem. Eng. J. | Pt/MoO2 | 1,000 | 200 | 89.55 | ~ 4.32* | ~ 463* | 207.3* |
| [11] | Small | CoS|Ni|P | 1,000 | 20 | 8.95 | ~ 11.45* | ~ 18* | 7.8* |
| [12] | DOE target | ̶ | 3,000 | 1,000 | 1,253.67 | ~ 0.13 | 80,000 | 100,503.1 |
| **-** | **Our work** | **HCP-MoOC** | **10,000** | **1,000** | **4,477.37** | **~ 0.11** | **90,909** | **407,033.6** |

* The values are estimated from the data in references.

References

[1] Yang J, Mohmad A R, Wang Y, Fullon R, Song X, Zhao F, Bozkurt I, Augustin M, Santos E J G, Shin H S, Zhang W, Voiry D, Jeong H Y and Chhowalla M 2019 Ultrahigh-current-density niobium disulfide catalysts for hydrogen evolution *Nat. Mater.* **18** 1309–14

[2] Wu J, Su J, Wu T, Huang L, Li Q, Luo Y, Jin H, Zhou J, Zhai T, Wang D, Gogotsi Y and Li Y 2023 Scalable Synthesis of 2D Mo2C and Thickness-Dependent Hydrogen Evolution on Its Basal Plane and Edges *Advanced Materials* **35** 2209954

[3] Yu Q, Zhang Z, Qiu S, Luo Y, Liu Z, Yang F, Liu H, Ge S, Zou X, Ding B, Ren W, Cheng H-M, Sun C and Liu B 2021 A Ta-TaS2 monolith catalyst with robust and metallic interface for superior hydrogen evolution *Nat Commun* **12** 6051

[4] Chen Y, Yu G, Chen W, Liu Y, Li G-D, Zhu P, Tao Q, Li Q, Liu J, Shen X, Li H, Huang X, Wang D, Asefa T and Zou X 2017 Highly Active, Nonprecious Electrocatalyst Comprising Borophene Subunits for the Hydrogen Evolution Reaction *J. Am. Chem. Soc.* **139** 12370–3

[5] Zheng Z, Yu L, Gao M, Chen X, Zhou W, Ma C, Wu L, Zhu J, Meng X, Hu J, Tu Y, Wu S, Mao J, Tian Z and Deng D 2020 Boosting hydrogen evolution on MoS2 via co-confining selenium in surface and cobalt in inner layer *Nat Commun* **11** 3315

[6] Luo Y, Tang L, Khan U, Yu Q, Cheng H-M, Zou X and Liu B 2019 Morphology and surface chemistry engineering toward pH-universal catalysts for hydrogen evolution at high current density *Nat Commun* **10** 269

[7] Zhang C, Luo Y, Tan J, Yu Q, Yang F, Zhang Z, Yang L, Cheng H-M and Liu B 2020 High-throughput production of cheap mineral-based two-dimensional electrocatalysts for high-current-density hydrogen evolution *Nat Commun* **11** 3724

[8] Liu R, Gong Z, Liu J, Dong J, Liao J, Liu H, Huang H, Liu J, Yan M, Huang K, Gong H, Zhu J, Cui C, Ye G and Fei H 2021 Design of Aligned Porous Carbon Films with Single-Atom Co–N–C Sites for High-Current-Density Hydrogen Generation *Advanced Materials* **33** 2103533

[9] Li G, Yu J, Jia J, Yang L, Zhao L, Zhou W and Liu H 2018 Cobalt–Cobalt Phosphide Nanoparticles@Nitrogen-Phosphorus Doped Carbon/Graphene Derived from Cobalt Ions Adsorbed Saccharomycete Yeasts as an Efficient, Stable, and Large-Current-Density Electrode for Hydrogen Evolution Reactions *Advanced Functional Materials* **28** 1801332

[10] Qiu Y, Liu S, Wei C, Fan J, Yao H, Dai L, Wang G, Li H, Su B and Guo X 2022 Synergistic effect between platinum single atoms and oxygen vacancy in MoO2 boosting pH-Universal hydrogen evolution reaction at large current density *Chemical Engineering Journal* **427** 131309

[11] Sun J, Ren M, Yu L, Yang Z, Xie L, Tian F, Yu Y, Ren Z, Chen S and Zhou H 2019 Highly Efficient Hydrogen Evolution from a Mesoporous Hybrid of Nickel Phosphide Nanoparticles Anchored on Cobalt Phosphosulfide/Phosphide Nanosheet Arrays *Small* **15** 1804272

[12] Open Energy Data. Energy.Gov. Https://Www.Energy.Gov/Data/Open-Energy-Data (Accessed 2024-05-07).
